# Supplementary material for: Effects of Haematococcus pluvialis Addition on the Sensory Properties of Plant-Based Meat Analogues
Source: MDPI journal article supplement (doi:10.3390/foods12183435), 2023-09-15
Supplement: s1 [file s1]

Table S1. Evaluate criteria and assign points of sensory property.

| Sensory property | Evaluate criteria                                                           | Assign points |
|------------------|-----------------------------------------------------------------------------|---------------|
| color            | Moderate redness and brightness, uniform and close to the traditional meat. | 8-10          |
|                  | slightly darker or lighter, uneven can be overlooked.                       | 6-8           |
|                  | significant dark, uneven slightly                                           | 4-6           |
|                  | Dark and uneven so that different to the traditional meat                   | 2-4           |
|                  | Color too dark or light, obviously different to traditional meat            | 0-2           |
| odor             | Slight fishy smell of soybeans and pleasant grassy aroma.                   | 8-10          |
|                  | Slight Soybean smell, pronounced grassy aroma but no pungent.               | 6-8           |
|                  | soybean smell, slight pleasant grassy flavor                                | 4-6           |
|                  | Obvious soybean smell and fishy aroma                                       | 2-4           |
|                  | Strong fishy of bean, fishy aroma of algae                                  | 0-2           |
